# Supplementary figures and images for: A Comparison of Total Antioxidant Capacities of Concord, Purple, Red, and Green Grapes Using the CUPRAC Assay
Source: MDPI journal article supplement (doi:10.3390/antiox2040257), 2013-10-17

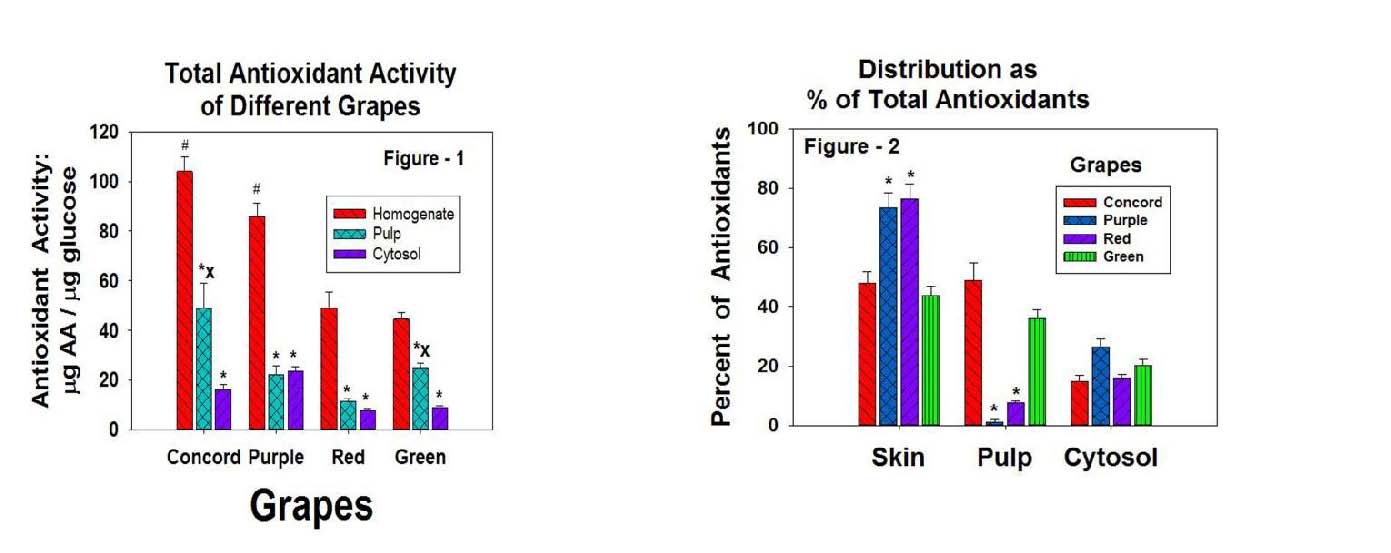

Supplement: s1 [file s1]
